# Supplementary material
Source: Springer Nature journal article supplement (https://www.springermedizin.de/resource/supplementary/13023_2009_180_MOESM4_ESM.pdf/9641802)
Supplement: MOESM4 [file 9641802]

# Congenital hypothyroidism: Diagnostic algorithm

Newborn Screen for hypothyroidism:  
Initial T4 <10%, TSH ↑  
Or Initial TSH ↑

Clinical suspicion of hypothyroidism

Measure serum TSH and  
free T4 (or T4 and T3 resin uptake)

TSH ↑ (>9 mU/L)  
Free T4 ↓ (<0.6 ng/dL)

**Diagnosis primary CH confirmed**

Other diagnostic studies to  
determine etiology (optional):

- Radionuclide uptake and scan
- Ultrasonography
- Serum thyroglobulin
- Maternal antithyroid antibodies
- Urinary iodine

TSH ↓ or normal (<9 mU/L)  
Free T4 ↓ (<0.6 ng/dL)

**Diagnosis likely secondary  
(central) hypothyroidism**

- Isolated: TSH $\beta$  gene analysis
- Evaluate for other pituitary hormone deficiencies
- MRI of brain
- Eye exam-check for optic nerve hypoplasia
